# Supplementary material for: Somatic symptom load in men and women from middle to high age in the Gutenberg Health Study - association with psychosocial and somatic factors
Source: PubMed Central journal article supplement (PMC6418216; doi:10.1038/s41598-019-40709-0), 2019-03-14
Supplement: 41598_2019_40709_MOESM1_ESM.pdf [file 41598_2019_40709_MOESM1_ESM.pdf]

**Somatic symptom load in men and women from middle to high age in the Gutenberg Health Study - association with psychosocial and somatic factors**

Manfred E. Beutel, MD, Jörg Wiltink, MD, Jasmin Ghaemi Kerahrodi, MD, Ana N. Tibubos, PhD, Elmar Brähler, PhD, Andreas Schulz, PhD, Philipp Wild, MD, Thomas Münzel, MD, Karl Lackner, MD, Jochem König, PhD, Norbert Pfeiffer, MD, Matthias Michal, MD, Michaela Henning, MD

**Supplementary Table 1a: Multiple linear regression models (men)**

|                                     | Model 1<br>sociodemographic<br>(N = 3811) |                  | Model 2 additional<br>cardiovascular risk<br>factors (N = 3808) |                  | Model 3 mental distress<br>(N = 3741) |                  | Model 4 somatic<br>diseases (N = 3713) |                  |
|-------------------------------------|-------------------------------------------|------------------|-----------------------------------------------------------------|------------------|---------------------------------------|------------------|----------------------------------------|------------------|
|                                     | b                                         | p                | b                                                               | p                | b                                     | p                | b                                      | p                |
| R <sup>2</sup> , F-value (df1, df2) | .0373, 36.9<br>(4, 3806)                  | <b>&lt;.0001</b> | .0532, 23.7<br>(9, 3798)                                        |                  | .231,<br>69.9 (16,<br>3724)           | <b>&lt;.0001</b> | .258, 64.3<br>(20, 3692)               | <b>&lt;.0001</b> |
| Age (10y)                           | 0.231                                     | <b>&lt;.0001</b> | 0.221                                                           | <b>&lt;.0001</b> | 0.417                                 | <b>&lt;.0001</b> | 0.259                                  | <b>&lt;.0001</b> |
| SES                                 | -0.0967                                   | <b>&lt;.0001</b> | -0.0827                                                         | <b>&lt;.0001</b> | -0.0754                               | <b>&lt;.0001</b> | -0.0707                                | <b>&lt;.0001</b> |
| Partnership                         | -0.0368                                   | .82              | -0.0852                                                         | .59              | 0.550                                 | <b>.00031</b>    | 0.532                                  | <b>.00040</b>    |
| Unemployment                        | 2.01                                      | <b>&lt;.0001</b> | 1.84                                                            | <b>&lt;.0001</b> | 1.30                                  | <b>.0011</b>     | 1.34                                   | .00068           |
| Hypertension                        |                                           |                  | 0.258                                                           | <b>.017</b>      | 0.234                                 | <b>.018</b>      | 0.193                                  | <b>.049</b>      |
| Obesity                             |                                           |                  | 0.618                                                           | <b>&lt;.0001</b> | 0.550                                 | <b>&lt;.0001</b> | 0.451                                  | <b>&lt;.0001</b> |
| Smoking                             |                                           |                  | 0.389                                                           | <b>.0052</b>     | 0.251                                 | <b>.047</b>      | 0.189                                  | .13              |
| FH of MI/Stroke                     |                                           |                  | 0.438                                                           | <b>.00022</b>    | 0.321                                 | <b>.0029</b>     | 0.259                                  | <b>.015</b>      |
| Alcohol abuse                       |                                           |                  | -0.320                                                          | .26              | -0.245                                | .35              | -0.165                                 | .52              |
| Social support                      |                                           |                  |                                                                 |                  | -0.103                                | <b>&lt;.0001</b> | -0.101                                 | <b>&lt;.0001</b> |
| Life events last 12<br>months       |                                           |                  |                                                                 |                  | 0.666                                 | <b>&lt;.0001</b> | 0.662                                  | <b>&lt;.0001</b> |
| PHQ9 ≥ 10                           |                                           |                  |                                                                 |                  | 3.16                                  | <b>&lt;.0001</b> | 3.13                                   | <b>&lt;.0001</b> |
| GAD2 ≥ 3                            |                                           |                  |                                                                 |                  | 1.00                                  | <b>&lt;.0001</b> | 0.950                                  | <b>&lt;.0001</b> |
| Panic                               |                                           |                  |                                                                 |                  | 1.59                                  | <b>&lt;.0001</b> | 1.50                                   | <b>&lt;.0001</b> |
| Social Phobia                       |                                           |                  |                                                                 |                  | 0.832                                 | <b>.0011</b>     | 0.751                                  | <b>.0029</b>     |
| Loneliness                          |                                           |                  |                                                                 |                  | 0.287                                 | .13              | 0.274                                  | .14              |
| Diabetes                            |                                           |                  |                                                                 |                  |                                       |                  | 0.141                                  | .31              |
| CVD                                 |                                           |                  |                                                                 |                  |                                       |                  | 1.01                                   | <b>&lt;.0001</b> |
| COPD                                |                                           |                  |                                                                 |                  |                                       |                  | 1.33                                   | <b>&lt;.0001</b> |
| Cancer                              |                                           |                  |                                                                 |                  |                                       |                  | 0.202                                  | .15              |

Note: b: unstandardized regression coefficient. p: p-value. Alcohol abuse: >60/40. Life events last 12 months: per 5 events. Social Phobia: Mini-Spin≥6.

**Supplementary Table 1b: Multiple linear regression models (women)**

|                                     | Model 1<br>sociodemographic<br>(N = 3433) |                  | Model 2 additional<br>cardiovascular risk<br>factors (N = 3430) |                  | Model 3 mental distress<br>(N = 3335) |                  | Model 4 somatic<br>diseases (N = 3309) |                  |
|-------------------------------------|-------------------------------------------|------------------|-----------------------------------------------------------------|------------------|---------------------------------------|------------------|----------------------------------------|------------------|
|                                     | b                                         | p                | b                                                               | p                | b                                     | p                | b                                      | p                |
| R <sup>2</sup> , F-value (df1, df2) | .0225, 19.8<br>(4, 3428)                  | <b>&lt;.0001</b> | .0369, 14.5<br>(9, 3420)                                        |                  | .222, 59.1<br>(16, 3318)              | <b>&lt;.0001</b> | .254, 56<br>(20, 3288)                 | <b>&lt;.0001</b> |
| Age (10y)                           | 0.0897                                    | .14              | 0.0753                                                          | .26              | 0.346                                 | <b>&lt;.0001</b> | 0.222                                  | <b>.00060</b>    |
| SES                                 | -0.109                                    | <b>&lt;.0001</b> | -0.0916                                                         | <b>&lt;.0001</b> | -0.0860                               | <b>&lt;.0001</b> | -0.0767                                | <b>&lt;.0001</b> |
| Partnership                         | -0.0900                                   | .58              | -0.0780                                                         | .63              | 0.532                                 | <b>.00043</b>    | 0.505                                  | <b>.00068</b>    |
| Unemployment                        | 1.26                                      | <b>.032</b>      | 1.18                                                            | <b>.045</b>      | -0.252                                | .64              | -0.395                                 | .47              |
| Hypertension                        |                                           |                  | 0.0243                                                          | .86              | 0.101                                 | .41              | 0.0520                                 | .67              |
| Obesity                             |                                           |                  | 0.797                                                           | <b>&lt;.0001</b> | 0.564                                 | <b>&lt;.0001</b> | 0.402                                  | <b>.0024</b>     |
| Smoking                             |                                           |                  | 0.229                                                           | .19              | 0.0311                                | .84              | 0.0418                                 | .79              |
| FH of MI/Stroke                     |                                           |                  | 0.511                                                           | <b>.00022</b>    | 0.409                                 | <b>.0011</b>     | 0.296                                  | <b>.017</b>      |
| Alcohol abuse                       |                                           |                  | 0.434                                                           | .38              | -0.290                                | .52              | -0.169                                 | .70              |
| Social support                      |                                           |                  |                                                                 |                  | -0.0854                               | <b>.0011</b>     | -0.0848                                | <b>&lt;.0001</b> |
| Life events last 12<br>months       |                                           |                  |                                                                 |                  | 0.741                                 | <b>.0011</b>     | 0.670                                  | <b>&lt;.0001</b> |
| PHQ9 ≥ 10                           |                                           |                  |                                                                 |                  | 2.18                                  | <b>.0011</b>     | 2.11                                   | <b>&lt;.0001</b> |
| GAD2 ≥ 3                            |                                           |                  |                                                                 |                  | 1.58                                  | <b>.0011</b>     | 1.52                                   | <b>&lt;.0001</b> |
| Panic                               |                                           |                  |                                                                 |                  | 1.76                                  | <b>.0011</b>     | 1.67                                   | <b>&lt;.0001</b> |
| Social Phobia                       |                                           |                  |                                                                 |                  | 0.655                                 | <b>.0061</b>     | 0.668                                  | <b>.0045</b>     |
| Loneliness                          |                                           |                  |                                                                 |                  | 0.757                                 | <b>.0011</b>     | 0.759                                  | <b>&lt;.0001</b> |
| Diabetes                            |                                           |                  |                                                                 |                  |                                       |                  | 0.205                                  | .33              |
| CVD                                 |                                           |                  |                                                                 |                  |                                       |                  | 1.32                                   | <b>&lt;.0001</b> |
| COPD                                |                                           |                  |                                                                 |                  |                                       |                  | 1.54                                   | <b>&lt;.0001</b> |
| Cancer                              |                                           |                  |                                                                 |                  |                                       |                  | 0.554                                  | <b>.00067</b>    |

Note: b: unstandardized regression coefficient. p: p-value. Alcohol abuse: > 60/40. Life events last 12 months: per 5 events. Social Phobia: Mini-Spin≥6.
